# Supplementary material for: Isolation and Biochemical Characterization of a New Thrombin-Like Serine Protease fromBothrops pirajaiSnake Venom
Source: Hindawi journal article supplement (doi:10.1155/2014/595186), 2014-01-01

# Supplementary Material

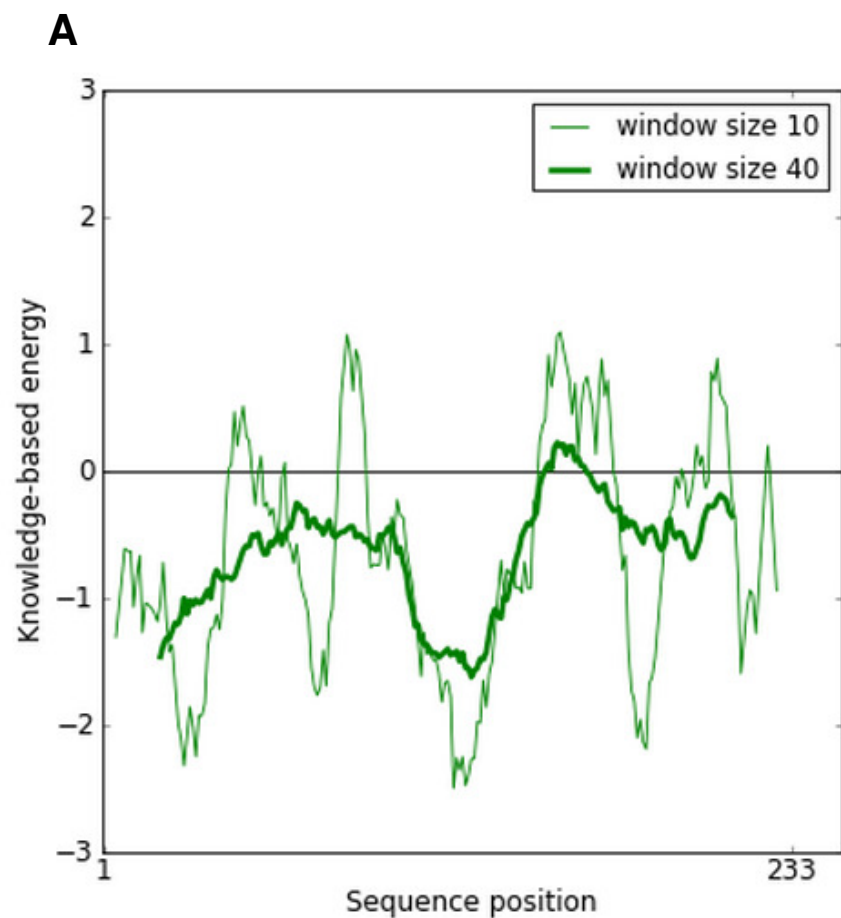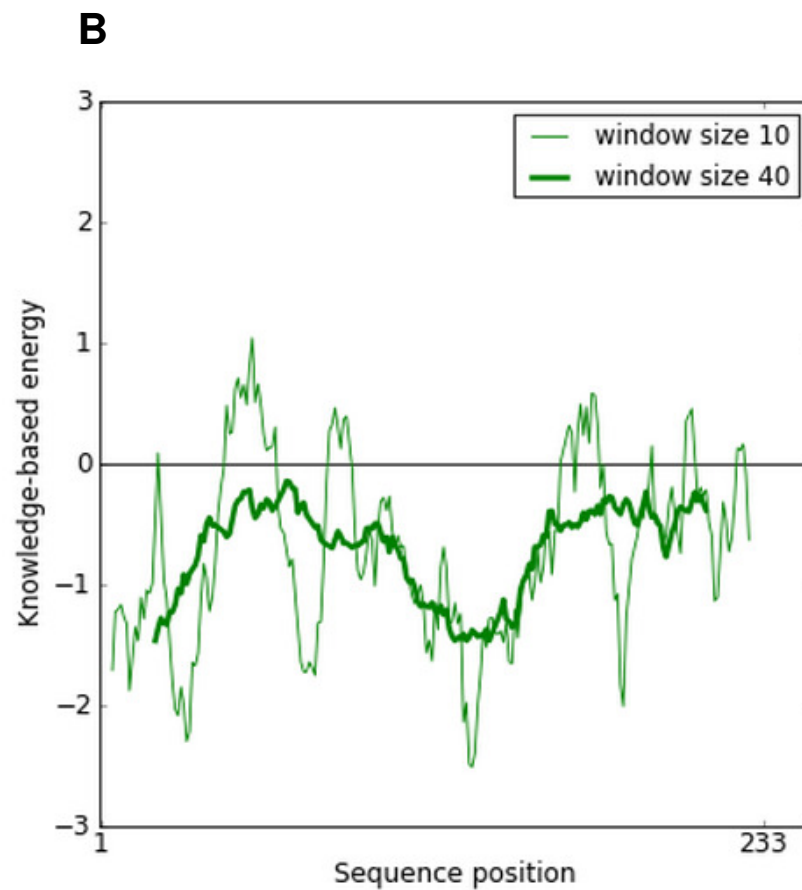

Supplement: f1 [file 595186.f1.pdf]
